# Supplementary material for: Fragmentation vs. functionalization: chemical aging and organic aerosol formation
Source: Copernicus journal article supplement (doi:10.5194/acp-11-10553-2011), 2011-10-25
Supplement: Supplementary file 1 [file Supplementary Material.pdf › Supplementary Material.pdf]

## Supplementary Material

### Fragmentation vs. Functionalization: Chemical Aging and Organic Aerosol Formation

Heber J. Chacon-Madrid

Neil M. Donahue

| Species oxidized                                        | Initial Concentration in the Smog Chamber | Initial NO <sub>x</sub> (ppb) | Initial VOC <sub>0</sub> /NO <sub>x</sub> (ppbC/ppb) | Initial OH concentration (molecule cm <sup>-3</sup> ) |
|---------------------------------------------------------|-------------------------------------------|-------------------------------|------------------------------------------------------|-------------------------------------------------------|
| <i>n</i> -Tridecanal                                    | ~250 ppb                                  | ~1700                         | 2                                                    | ~1×10 <sup>7</sup>                                    |
| Pinonaldehyde                                           | ~300 ppb                                  | ~4000                         | 0.8                                                  | ~0.5×10 <sup>7</sup>                                  |
| <i>n</i> -Pentadecane<br>Presto <i>et al.</i> ,<br>2010 | 2 to 9 ppb                                | -                             | 0.03-0.1                                             | -                                                     |
| 2-Tridecanone                                           | ~40 ppb                                   | ~3500                         | 0.15                                                 | ~0.5×10 <sup>7</sup>                                  |
| 7-Tridecanone                                           | ~35 ppb                                   | ~3000                         | 0.15                                                 | ~0.5×10 <sup>7</sup>                                  |
| <i>n</i> -Nonadecane                                    | ~2 ppb                                    | ~1800                         | 0.02                                                 | ~0.5×10 <sup>7</sup>                                  |
| <i>n</i> -Heptadecanal                                  | ~3 ppb                                    | ~5000                         | 0.01                                                 | ~1×10 <sup>7</sup>                                    |

**Table A.***Supplementary Data*

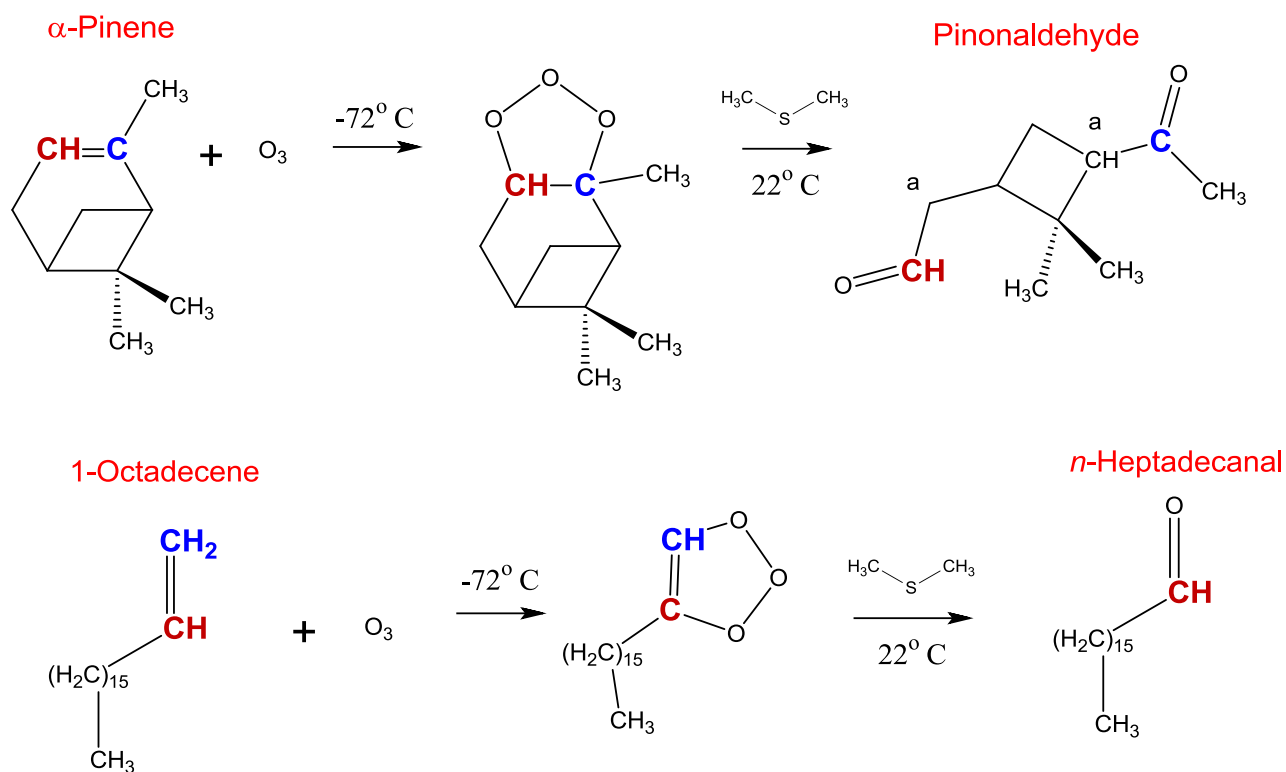

**Figure A.**  $\alpha$ -Pinene and 1-octadecene were reacted (separately) with a flow of excess-ozone at  $-72^\circ\text{C}$  to form the primary ozonide. Dimethylsulfide was used as a reducing agent to form the corresponding dicarbonyl. A bicarbonate solution was used to extract the carboxylic acids formed and other water soluble impurities. The procedure followed was the one by McMurry et al. (1987).

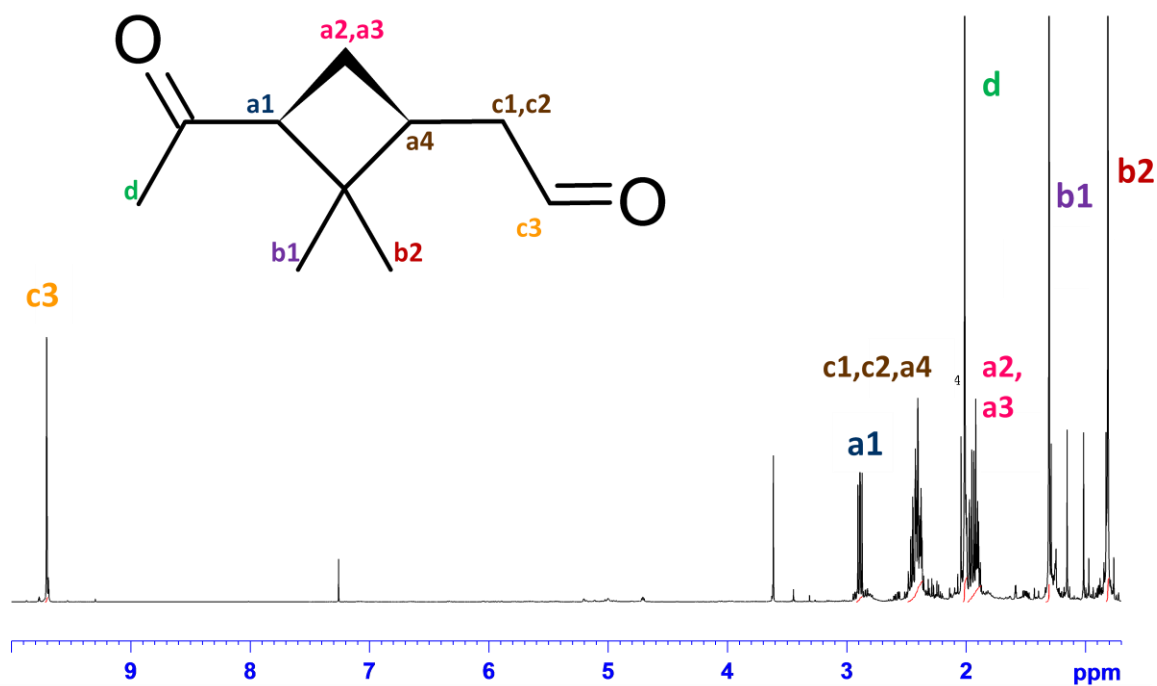

**Figure B.**  $^1\text{H}$  NMR spectra were taken from the synthesized-pinonaldehyde sample in order to assess its purity level. Pinonaldehyde composed approximately ~85% of the sample, including the *cis*- and *trans*-isomers. Other minor species like peroxides were found. No acids were encountered. The biggest impurity was dimethyl sulfoxide (DMSO, at ~3.6 ppm). The signal at approximately 7.2 ppm corresponds to  $\text{CDCl}_3$ , which was the solvent used when the NMR spectra were taken.

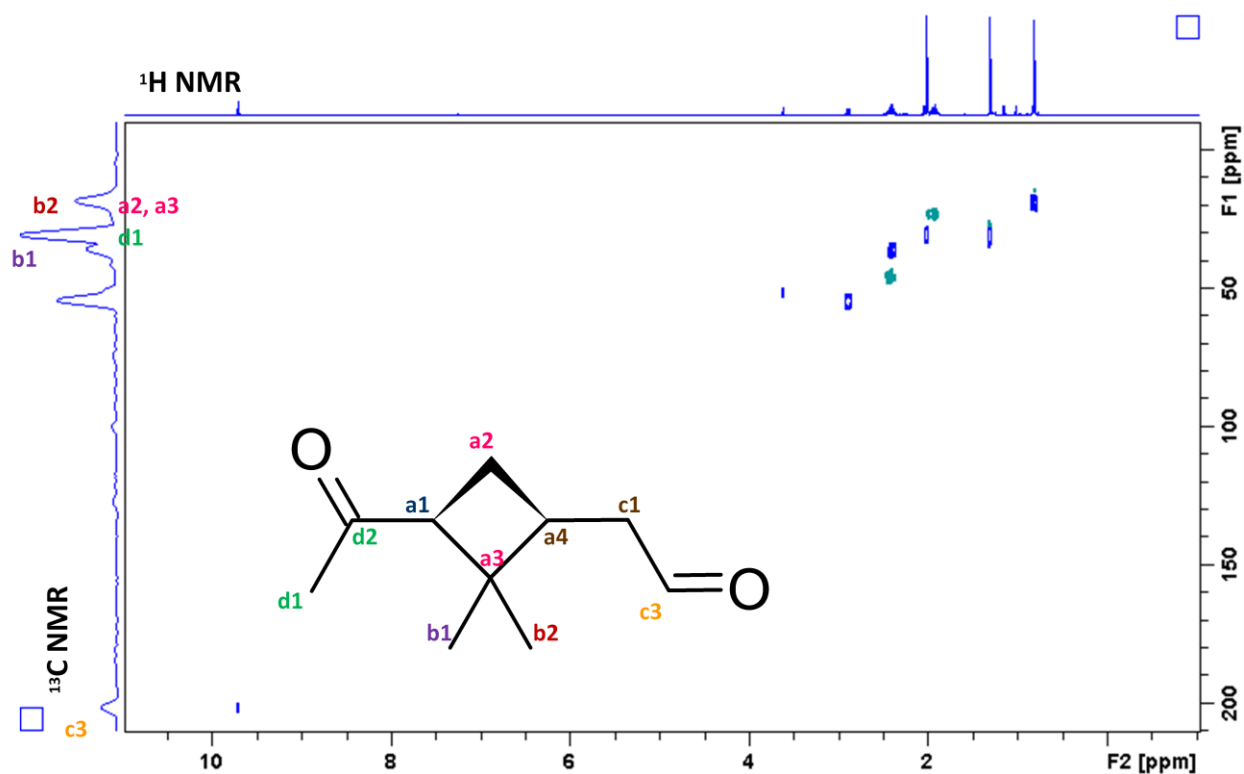

**Figure C.** This is a Heteronuclear Single Quantum Coherence (HSQC) spectra of the synthesized-pinonaldehyde sample that gives a strong suggestion of the abundance of the pinonadehyde structure. There is an excellent connection between the  $^{13}\text{C}$  NMR and the  $^1\text{H}$  NMR which shows pinonaldehyde as the most abundant species in the sample.

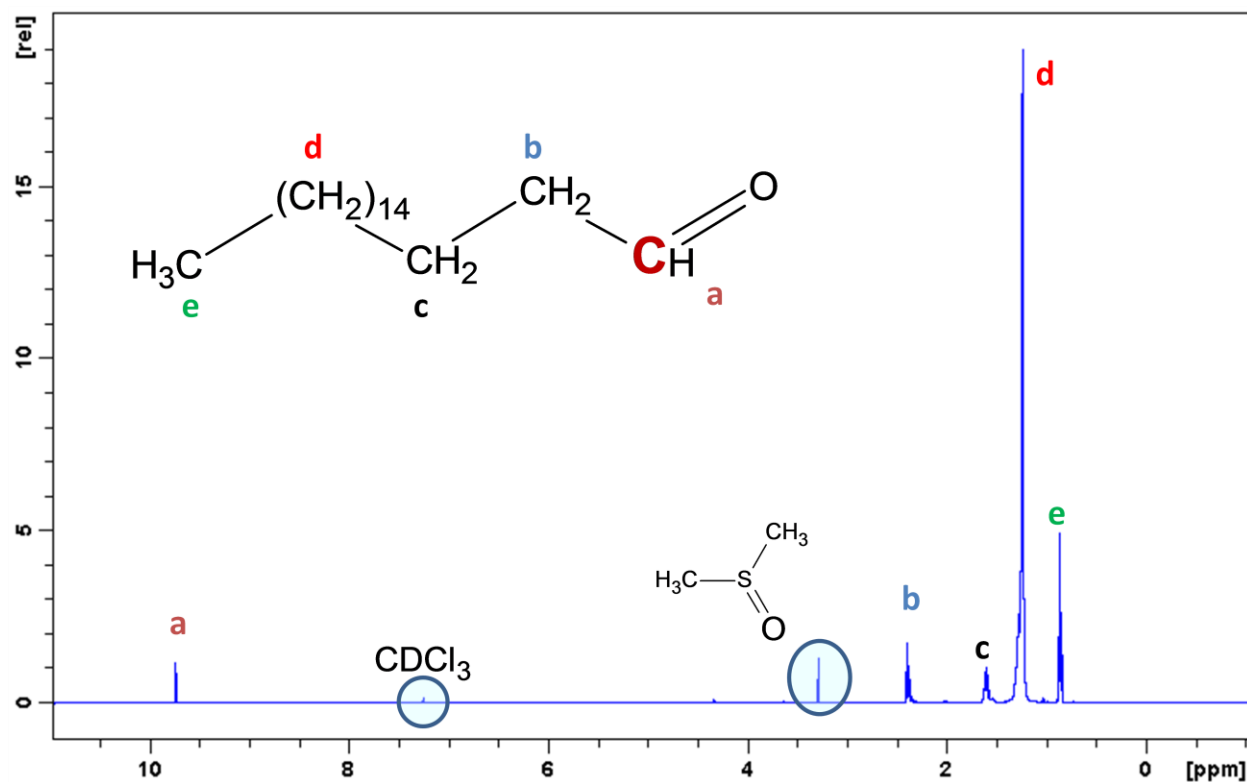

**Figure D.** This  $^1\text{H}$  NMR spectra shows the presence of *n*-heptadecanal as the major product (>90%). The major contaminant is DMSO at  $\sim 3.3$  ppm.  $\text{CDCl}_3$  was the solvent used when the NMR spectra were taken, reason for a peak at  $\sim 7.2$  ppm. Other than DMSO, contaminants such as peroxides are observed in minor concentrations.

Supplementary Data

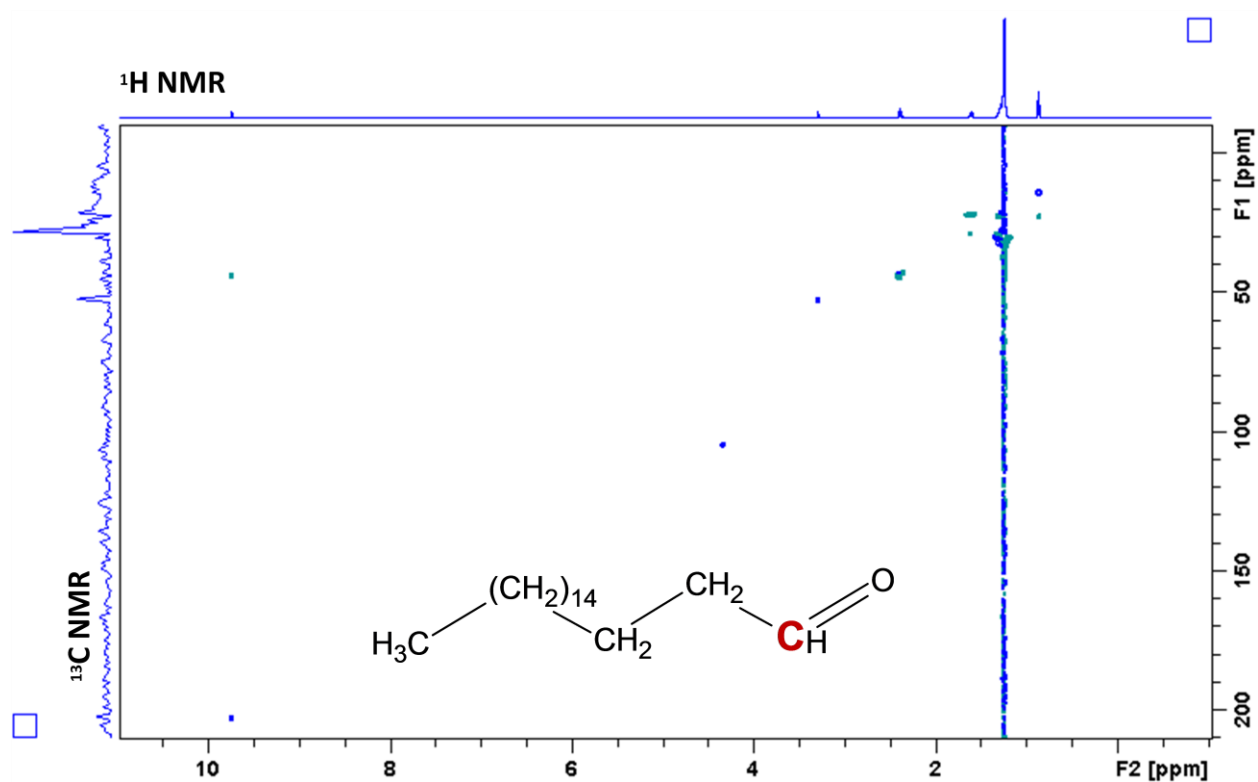

**Figure E.** This is an HSQC spectra of the synthesized-*n*-heptadecanal sample. This spectra strongly suggests abundance of *n*-heptadecanal in the sample. There is an excellent connection between the  $^{13}\text{C}$  NMR and the  $^1\text{H}$  NMR, describing *n*-heptadecanal as the most abundant species in the sample.

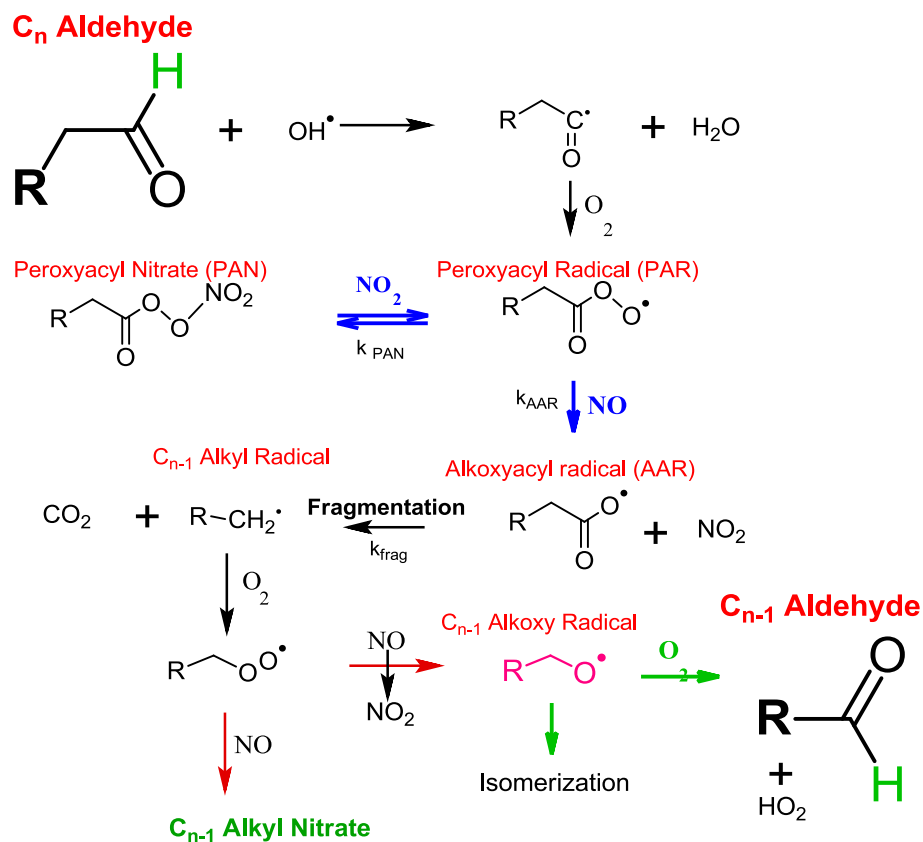

**Figure F.** Reaction mechanism of  $n$ -aldehyde + OH radical in the presence of high  $\text{NO}_x$ . The first branching point in the reaction mechanism (shown in blue) is the peroxyacyl radical (PAR) becoming either a peroxyacyl nitrate (PAN) or an alkoxyacyl radical (AAR). The alkoxyacyl radical will fragment and form a  $\text{C}_{n-1}$  alkyl radical that will eventually branch between a  $\text{C}_{n-1}$  alkyl nitrate and a  $\text{C}_{n-1}$  alkoxy radical. This alkoxy radical branches (arrows in green) between the  $\text{C}_{n-1}$  aldehyde and an isomerization structure. Long straight-chain aldehydes have a preference towards isomerization in this last step.

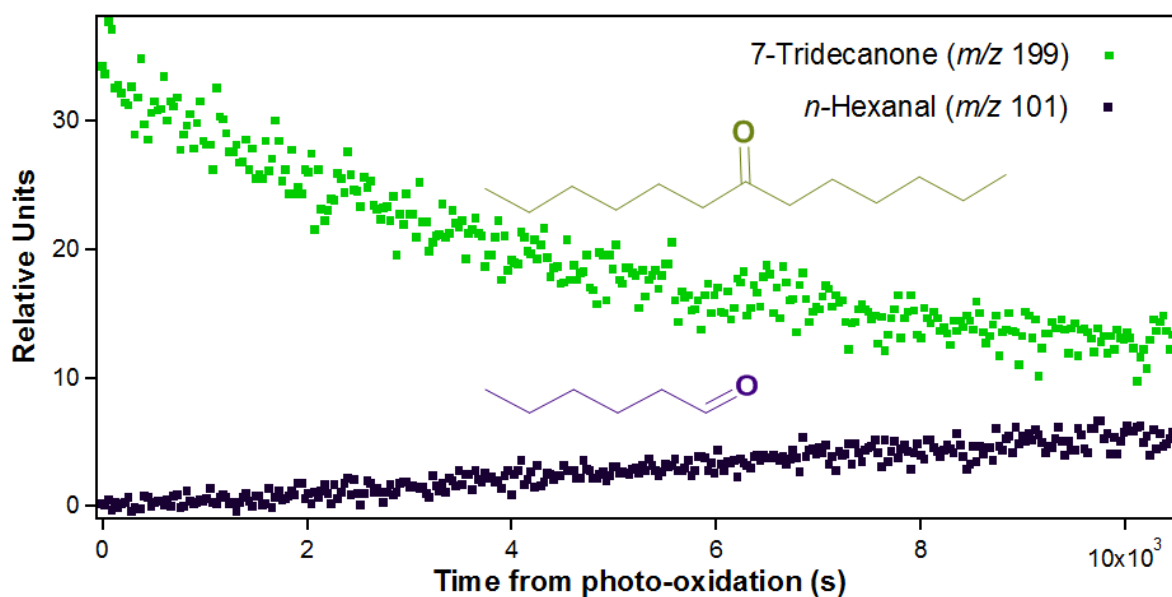

**Figure G.** Fragmentation of 7-tridecanone via OH radical oxidation in the presence of NO<sub>x</sub> forms *n*-hexanal. The signals presented here have not been calibrated. *n*-Hexanal can be formed from attack on the α- and β-hydrogens of 7-tridecanone (refer to Figure 7, main manuscript). The reaction of 2-tridecanone with OH in the presence of NO<sub>x</sub> does not show the formation of its respective aldehyde. That is because chemical fragmentation is a smaller path for 2-tridecanone versus 7-tridecanone.
